# Supplementary material for: Experimental Model Systems Used in the Preclinical Development of Nucleic Acid Therapeutics
Source: PubMed Central journal article supplement (PMC10457615; doi:10.1089/nat.2023.0001), 2023-08-09
Supplement: Suppl_DataS1.pdf [file Suppl_DataS1.pdf]

# Supplementary File 1

Name and Surname(s) \*

Your answer \_\_\_\_\_

Contact email \*

Your answer \_\_\_\_\_

Country (you are based in) \*

Your answer \_\_\_\_\_

PI of the research group \*

Your answer \_\_\_\_\_

Disease of interest \*

Your answer \_\_\_\_\_

Cellular models

Please describe the cellular models you use the most in your research to a maximum of 3 options. Please use the different boxes for each cell line. It is not needed to provide three cellular models, but some labs may use 2 or more complementary model systems. Please only describe the models you would consider yourself an expert.

Cellular model #1

Cell line #1

Your answer \_\_\_\_\_

Purpose

Efficacy

Safety/Toxicology

Delivery

Other: \_\_\_\_\_

Type of molecule assessed

splice switching oligonucleotides

gapmers

siRNA

mRNA

nanoparticles

Other: \_\_\_\_\_

Type of analysis/readout

RNA

Protein (Western Blot)

Other: \_\_\_\_\_

Cellular model #2

Optional

Cell line #2

Your answer \_\_\_\_\_

Purpose

Efficacy

Safety/Toxicology

Delivery

Other: \_\_\_\_\_

Type of molecule assessed

splice switching oligonucleotides

gapmers

siRNA

mRNA

nanoparticles

Other: \_\_\_\_\_

Type of analysis/readout

RNA

Protein (Western Blot)

Other: \_\_\_\_\_

Cellular model #3

Optional

Cell line #3

Your answer \_\_\_\_\_

Purpose

Efficacy

Safety/Toxicology

Delivery

Other: \_\_\_\_\_

Type of molecule assessed

splice switching oligonucleotides

gapmers

siRNA

mRNA

nanoparticles

Other: \_\_\_\_\_

Type of analysis/readout

RNA

Protein (Western Blot)

Other: \_\_\_\_\_

Animal models

Please describe the animal models you use the most in your research to a maximum of 3 options. Please use the different boxes for each model. It is not needed to provide three models. Please only describe the models you would consider yourself an expert.

Animal model #1

Model (provide in this order: species, genetic modification (if known), website (if commercially available) or PMID for the publication describing it)

Your answer \_\_\_\_\_

Organ(s) of interest

Brain

Eye

Heart

Kidney

Liver

Lung

Muscle

Skin

Other: \_\_\_\_\_

Type of delivery (write full name, not abbreviations)

Your answer \_\_\_\_\_

Purpose

Efficacy

Safety/Toxicology

Delivery

Other: \_\_\_\_\_

Type of molecule assessed

splice switching oligonucleotides

gapmers

siRNA

mRNA

nanoparticles

Other: \_\_\_\_\_

Type of analysis/readout

RNA

Protein (Western blot)

(Immuno)Histochemical

Other: \_\_\_\_\_

Animal model #2

Optional

Model (provide in this order: species, genetic modification (if known), website (if commercially available) or PMID for the publication describing it)

Your answer \_\_\_\_\_

Organ(s) of interest

Brain

Eye

Heart

Kidney

Liver

Lung

Muscle

Skin

Other: \_\_\_\_\_

Type of delivery (write full name, not abbreviations)

Your answer \_\_\_\_\_

Purpose

Efficacy

Safety/Toxicology

Delivery

Other: \_\_\_\_\_

Type of molecule assessed

splice switching oligonucleotides

gapmers

siRNA

mRNA

nanoparticles

Other: \_\_\_\_\_

Type of analysis/readout

RNA

Protein (Western blot)

(Immuno)Histochemical

Other: \_\_\_\_\_

Animal model #3

Optional

Model (provide in this order: species, genetic modification (if known), website (if commercially available) or PMID for the publication describing it)

Your answer \_\_\_\_\_

Organ(s) of interest

Brain

Eye

Heart

Kidney

Liver

Lung

Muscle

Skin

Other: \_\_\_\_\_

Type of delivery (write full name, not abbreviations)

Your answer \_\_\_\_\_

Purpose

Efficacy

Safety/Toxicology

Delivery

Other: \_\_\_\_\_

Type of molecule assessed

splice switching oligonucleotides

gapmers

siRNA

mRNA

nanoparticles

Other: \_\_\_\_\_

Type of analysis/readout

RNA

Protein (Western blot)

(Immuno)Histochemical

Other: \_\_\_\_\_

Animal model #3

Optional

Model (provide in this order: species, genetic modification (if known), website (if commercially available) or PMID for the publication describing it)

Your answer \_\_\_\_\_

Organ(s) of interest

Brain

Eye

Heart

Kidney

Liver

Lung

Muscle

Skin

Other: \_\_\_\_\_

Type of delivery (write full name, not abbreviations)

Your answer \_\_\_\_\_

Purpose

Efficacy

Safety/Toxicology

Delivery

Other: \_\_\_\_\_

Type of molecule assessed

splice switching oligonucleotides

gapmers

siRNA

mRNA

nanoparticles

Other: \_\_\_\_\_

Type of analysis/readout

RNA

Protein (Western blot)

(Immuno)Histochemical

Other: \_\_\_\_\_
