# Supplementary material for: Experimental Model Systems Used in the Preclinical Development of Nucleic Acid Therapeutics
Source: PubMed Central journal article supplement (PMC10457615; doi:10.1089/nat.2023.0001), 2023-08-09
Supplement: Suppl_FigureS1.pdf [file Suppl_FigureS1.pdf]

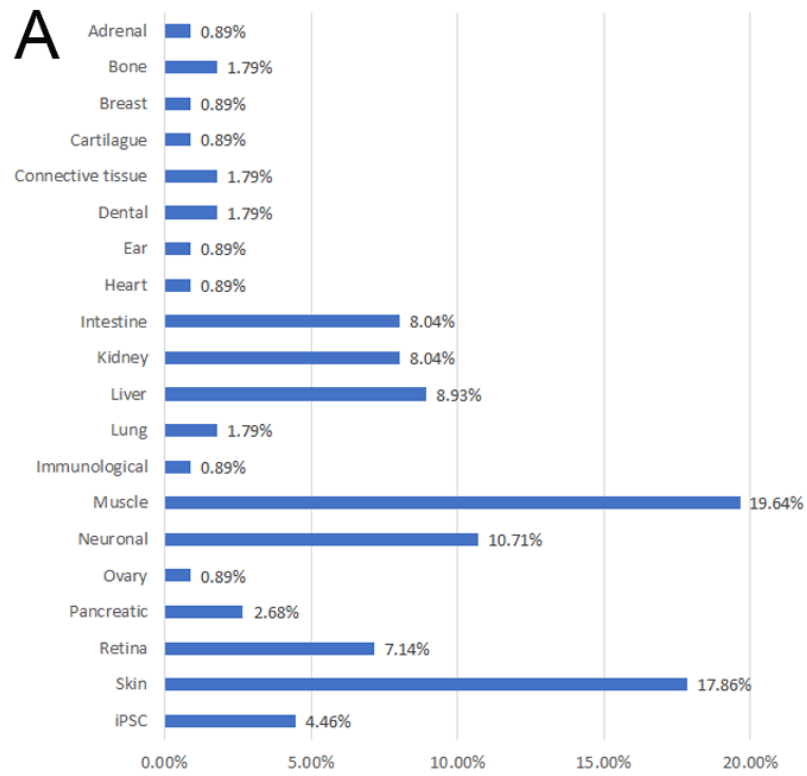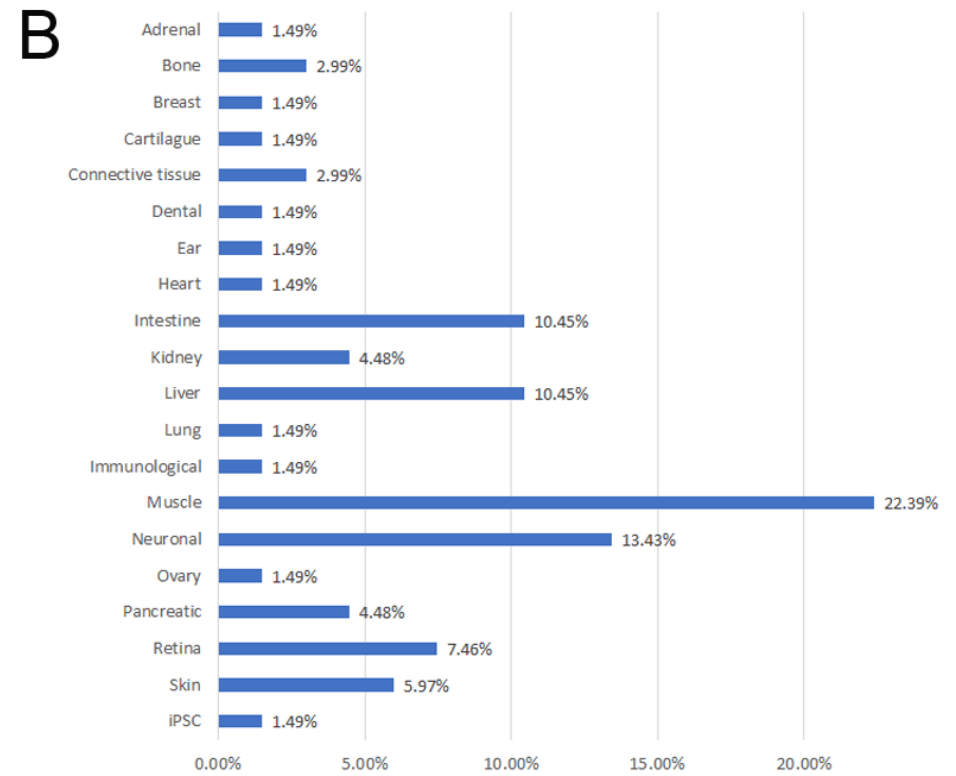

Supplementary Figure S1 – Distribution per tissue of the different cell lines based on the total number of answers (A) or per unique entries (B).
