# Supplementary material for: Experimental Model Systems Used in the Preclinical Development of Nucleic Acid Therapeutics
Source: PubMed Central journal article supplement (PMC10457615; doi:10.1089/nat.2023.0001), 2023-08-09
Supplement: Suppl_FigureS2.pdf [file Suppl_FigureS2.pdf]

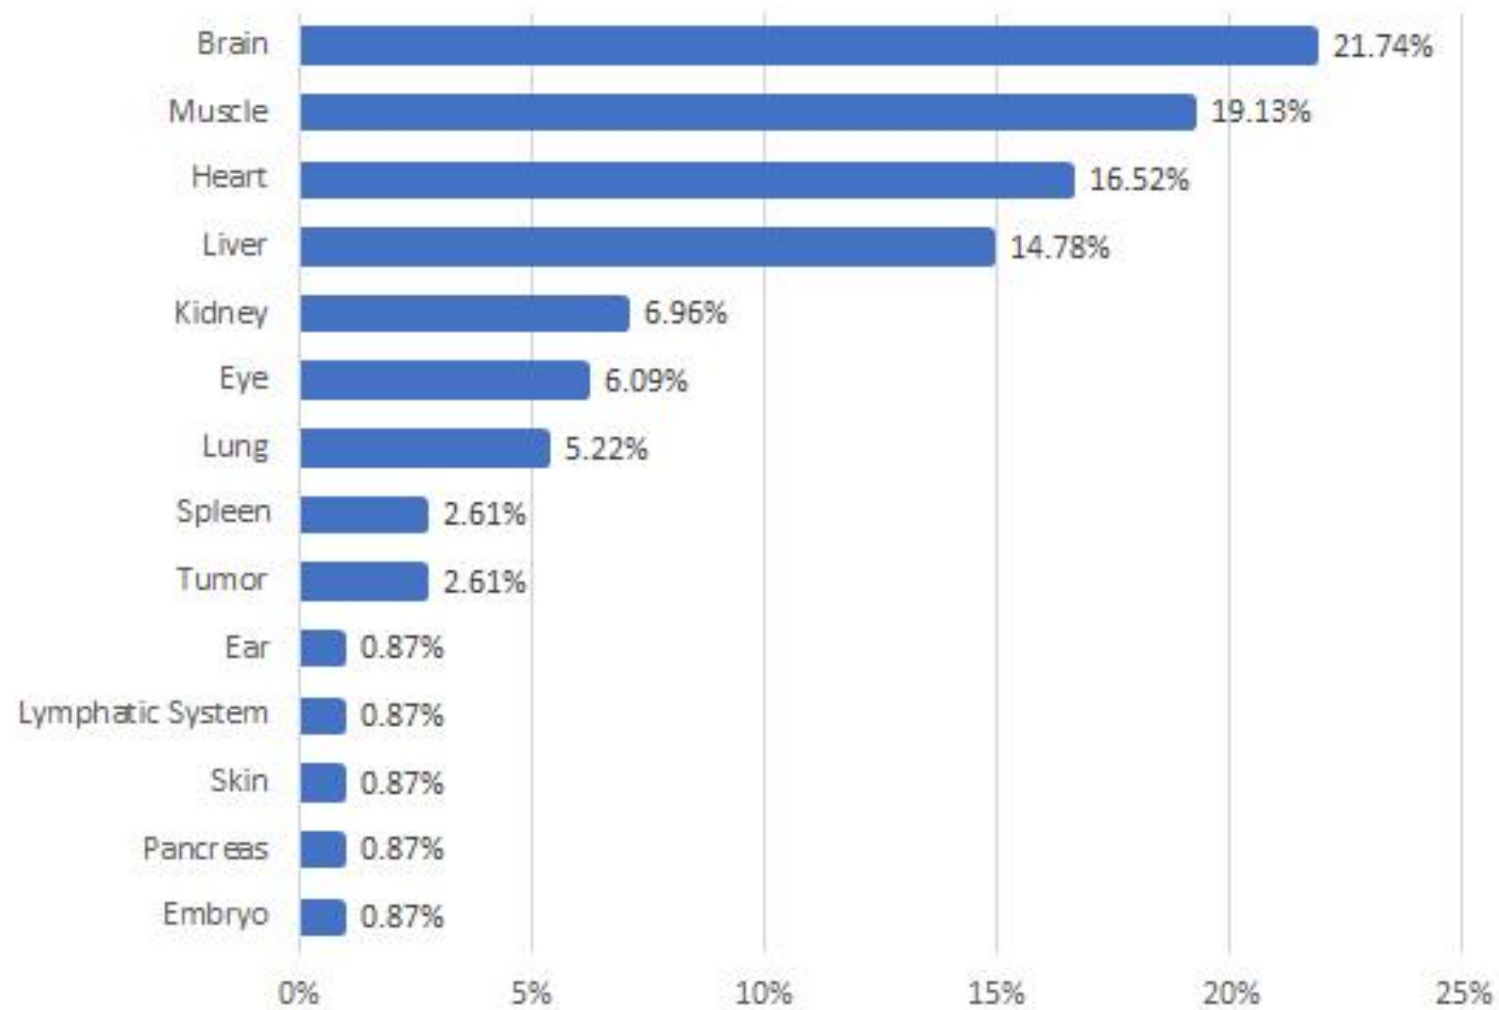

Supplementary Figure S2 – Distribution of the tissues of interest in animal models.
