# Supplementary material for: Experimental Model Systems Used in the Preclinical Development of Nucleic Acid Therapeutics
Source: PubMed Central journal article supplement (PMC10457615; doi:10.1089/nat.2023.0001), 2023-08-09
Supplement: Suppl_TableS1.pdf [file Suppl_TableS1.pdf]

**Table S1 – List of unique cell line entries after correcting per research group**

| <b>Unique entry</b>                              | <b>Percentage answers</b> |
|--------------------------------------------------|---------------------------|
| 4T1                                              | 0.9%                      |
| A2780                                            | 0.9%                      |
| AB1190                                           | 0.9%                      |
| AB943                                            | 0.9%                      |
| C2C12                                            | 1.8%                      |
| COS7                                             | 0.9%                      |
| Dental Pulp Stem Cells                           | 1.8%                      |
| Epithelial cells                                 | 0.9%                      |
| Fibroblasts                                      | 15.0%                     |
| Fibromyod                                        | 0.9%                      |
| H2K                                              | 2.7%                      |
| HCC2998 colorectal cancer cells                  | 0.9%                      |
| HCT-15                                           | 0.9%                      |
| HEI-OC1                                          | 0.9%                      |
| HEK293T                                          | 6.2%                      |
| HeLa                                             | 2.7%                      |
| Hep3B                                            | 1.8%                      |
| Hepatocytes                                      | 0.9%                      |
| Hepatoma cell line                               | 0.9%                      |
| HepG2                                            | 2.7%                      |
| HTB38 colorectal cancer cells                    | 0.9%                      |
| hTERT-RPE1                                       | 0.9%                      |
| HuH7                                             | 0.9%                      |
| Human neuroblastoma cells (SH-SY5Y)              | 2.7%                      |
| Human pancreatic beta cell line                  | 0.9%                      |
| iMCD3                                            | 0.9%                      |
| Immortalized human myoblasts                     | 3.5%                      |
| Immortalized mouse muscle cells                  | 0.9%                      |
| Intervertebral disc progenitor                   | 0.9%                      |
| Intestinal organoids                             | 0.9%                      |
| Intestinal cells                                 | 0.9%                      |
| iPSC                                             | 4.4%                      |
| iPSC-derived brain organoids                     | 0.9%                      |
| iPSC-derived human islets                        | 0.9%                      |
| iPSC-derived neurons                             | 0.9%                      |
| iPSC-derived photoreceptor precursor cells (PPC) | 1.8%                      |
| iPSC-derived retinal organoids                   | 1.8%                      |
| iPSC-derived RPE                                 | 0.9%                      |
| JHH6                                             | 0.9%                      |
| Jurkat E6.1                                      | 0.9%                      |
| KM (human myocyte)                               | 1.8%                      |
| Km155                                            | 0.9%                      |

|                                          |      |
|------------------------------------------|------|
| L6 skeletal muscle cells                 | 0.9% |
| Liver organoids                          | 0.9% |
| M14K, malignant pleural mesothelioma     | 0.9% |
| MDA-MB-231                               | 1.8% |
| Mesenchymal stromal cell (MSC)           | 0.9% |
| Mouse neuroblastoma (N1E-115-1)          | 0.9% |
| Myocyte                                  | 0.9% |
| NCI-H520, squamous cell carcinoma (lung) | 0.9% |
| Neural Progenitor Cells                  | 0.9% |
| Neuro2A                                  | 0.9% |
| Neuroblastoma                            | 1.8% |
| Osteoblast                               | 0.9% |
| Osteoclast                               | 0.9% |
| PC-12 (mouse pheochromocytoma)           | 0.9% |
| PLC                                      | 0.9% |
| Primary cardiomyocyte                    | 0.9% |
| Primary human islets                     | 0.9% |
| Primary human myoblasts                  | 0.9% |
| primary human skeletal muscle cells      | 0.9% |
| Primary muscle                           | 0.9% |
| Primary rat neuron                       | 0.9% |
| RAW264 macrophages                       | 0.9% |
| RKO                                      | 0.9% |
| Satellite cells                          | 0.9% |
| U251-MG - human glioblastoma             | 0.9% |
| WERI-Rb-1                                | 0.9% |
